# Supplementary material
Source: Springer Nature journal article supplement (https://www.springermedizin.de/resource/supplementary/13046_2011_458_MOESM1_ESM.pdf/9662274)

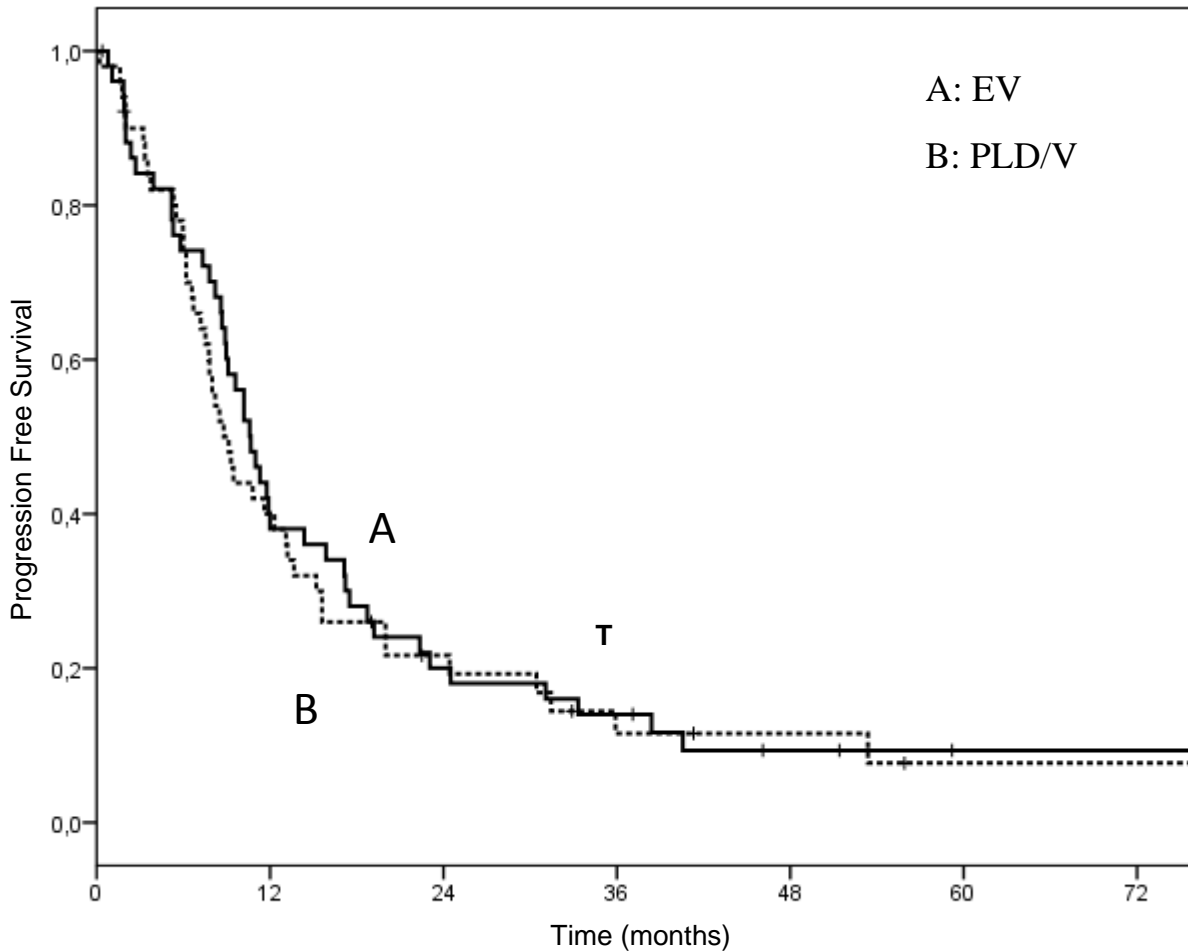

E: epirubicin; V: vinorelbine; PLD: pegylated liposomal doxorubicin

Supplement: MOESM1 [file 9662274]
